# Supplementary material
Source: PubMed Central journal article supplement (PMC10840750)
Supplement: NIHMS1929893-supplement-Supinfo.pdf [file NIHMS1929893-supplement-Supinfo.pdf]

**Supporting information for:**

**Impact of housing temperature on adipose tissue HDAC9 expression and adipogenic differentiation in high fat fed mice**

Samah Ahmadi<sup>1,2,\*</sup>, Brandee Goo<sup>2,\*</sup>, Abdalrahman Zarzour<sup>1,2,\*</sup>, David Kim<sup>2</sup>, Hong Shi<sup>1,2</sup>, Praneet Veerapaneni<sup>2</sup>, Ronnie Chouhaita<sup>2</sup>, Nicole K.H. Yiew<sup>2,3</sup>, Carla Dominguez Gonzalez<sup>2</sup>, Akash Chakravartty<sup>2</sup>, James Pennoyer<sup>2</sup>, Nazeera Hassan<sup>2</sup>, Tyler W. Benson<sup>2</sup>, Mourad Oghi<sup>2</sup>, David J. Fulton<sup>2,3</sup>, Richard Lee<sup>4</sup>, Robert D. Rice<sup>4</sup>, Vijay Patel<sup>3</sup>, Renee Hilton<sup>4</sup>, Yun Lei<sup>5</sup>, Xin-Yun Lu<sup>5</sup>, Weiqin Chen<sup>6</sup>, Ha Won Kim<sup>1,2</sup>, Neal L. Weintraub<sup>1,2,#</sup>

Department of Medicine<sup>1</sup>, Vascular Biology Center<sup>2</sup>, Pharmacology and Toxicology<sup>3</sup>, Surgery<sup>4</sup>, Neuroscience and Regenerative Medicine<sup>5</sup>, Physiology<sup>6</sup>, Medical College of Georgia at Augusta University, Augusta, GA

#Address for correspondence: Neal L. Weintraub, MD  
1459 Laney Walker Blvd, Augusta, GA 30912 (Email) [nweintraub@augusta.edu](mailto:nweintraub@augusta.edu)

# Supplemental Figure S1

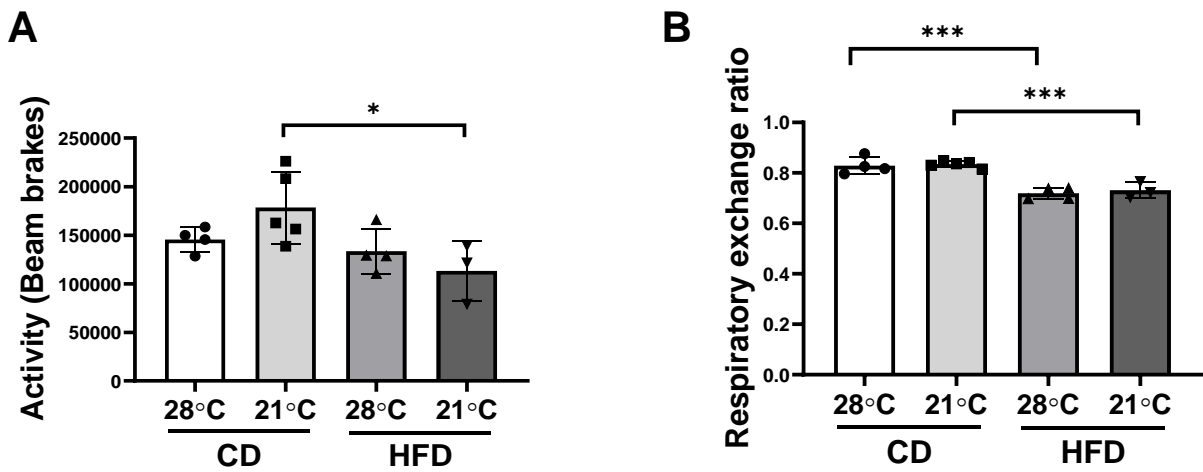

**Figure S1:** Quantification of activity and respiratory exchange ratio. **(A)** Locomotor activity measured as beam breaks over 48 hr measurement period of mice fed CD or HFD under ambient or thermoneutral housing (n=3-5). **(B)** Respiratory exchange ratio (VCO<sub>2</sub> production/VO<sub>2</sub> consumption) (n=3-5). Data are represented as mean ± SD. \*p<0.05, \*\*\*\*p<0.0001.

# Supplemental Figure S2

## Descriptive Statistics

Dependent Variable: Expenditure\_24hr

| Conditions | Mean    | Std. Deviation | N  |
|------------|---------|----------------|----|
| 0          | 11.9334 | .61379         | 5  |
| 1          | 8.9475  | .71304         | 4  |
| 2          | 11.4525 | .88228         | 4  |
| 3          | 15.9300 | .64969         | 3  |
| Total      | 11.8161 | 2.45625        | 16 |

- 0: CD 28°C
- 1: CD 21°C
- 2: HFD 28°C
- 3: HFD 21°C

## Levene's Test of Equality of Error Variances<sup>a</sup>

Dependent Variable: Expenditure\_24hr

| F    | df1 | df2 | Sig. |
|------|-----|-----|------|
| .346 | 3   | 12  | .793 |

Tests the null hypothesis that the error variance of the dependent variable is equal across groups.

a. Design: Intercept + Massg + Conditions

- Dependent variable: energy expenditure
- Independent variable: conditions
- Covariate analyzed: mass (in grams)

## Tests of Between-Subjects Effects

Dependent Variable: Expenditure\_24hr

| Source          | Type III Sum of Squares | df | Mean Square | F      | Sig.  | Partial Eta Squared |
|-----------------|-------------------------|----|-------------|--------|-------|---------------------|
| Corrected Model | 84.766 <sup>a</sup>     | 4  | 21.191      | 40.672 | <.001 | .937                |
| Intercept       | 15.430                  | 1  | 15.430      | 29.614 | <.001 | .729                |
| Massg           | .480                    | 1  | .480        | .922   | .358  | .077                |
| Conditions      | 54.606                  | 3  | 18.202      | 34.934 | <.001 | .905                |
| Error           | 5.731                   | 11 | .521        |        |       |                     |
| Total           | 2324.407                | 16 |             |        |       |                     |
| Corrected Total | 90.497                  | 15 |             |        |       |                     |

a. R Squared = .937 (Adjusted R Squared = .914)

**Figure S2.** One way ANCOVA was performed to assess one independent variable (conditions) within four groups (CD 28°C, CD 21°C, HFD 28°C, HFD 21°C). Conditions (CD/HFD, 28°C/21°C), when controlled for body mass, had a statistically significant effect in controlling the mean of 24 hr energy expenditure ( $p < 0.001$ ). Mass in grams did not have a statistically significant effect in controlling the mean of 24 hr energy expenditure. Homogenous distribution of variance was confirmed before ANCOVA analysis ( $p = 0.793$ ).
